# Supplementary material
Source: MDPI journal article supplement (https://www.mdpi.com/2073-4344/13/6/922)
Supplement: s1 [file s1 › catalysts-2395783-supplementary.pdf]

Supporting Information

# Laser-Induced Nitrogen-Doped Graphene Composite Iron–Cobalt Hydroxide for Methylene Blue Degradation via Electrocatalytic Activation of Peroxymonosulfate

Liqin Chen <sup>1</sup>, Jianjun Liao <sup>1,\*</sup>, Chen Li <sup>2</sup>, Yandong Xu <sup>1</sup>, Chengjun Ge <sup>1,\*</sup>, Wen Xu <sup>1</sup>, Xiong He <sup>3</sup> and Wenyu Liu <sup>4</sup>

<sup>1</sup> Key Laboratory of Agro-Forestry Environmental Processes and Ecological Regulation of Hainan Province, School of Ecological and Environmental Sciences, Hainan University, Haikou 570228, China; chenlq261@163.com (L.C.); xuyandong1997@163.com (Y.X.); qstcgcb@163.com (W.X.)

<sup>2</sup> Hainan Provincial Ecological and Environmental Monitoring Centre, Haikou 571126, China; llqq34@163.com

<sup>3</sup> Shandong Jingbo Holding Group Co., Ltd., Binzhou 256599, China; mzxq31@163.com

<sup>4</sup> Shandong Haitian Environmental Protection Technology Co., Ltd., Binzhou 256599, China; chocoyun1029@163.com

\* Correspondence: liaojianjun008@163.com (J.L.); cjge3007@163.com (C.G.)

## Text S1 Chemicals and materials

Methylene blue (MB), Cobalt nitrate ( $\text{Co}(\text{NO}_3)_2 \cdot 6\text{H}_2\text{O}$ ), Ferric nitrate nonahydrate ( $\text{Fe}(\text{NO}_3)_3 \cdot 9\text{H}_2\text{O}$ ), Sodium chloride (NaCl), Sodium bicarbonate ( $\text{NaHCO}_3$ ), Sodium sulfate anhydrous ( $\text{Na}_2\text{SO}_4$ ), Sodium hydroxide (NaOH), Sodium thiosulfate ( $\text{Na}_2\text{S}_2\text{O}_3$ ), Monosodium phosphate ( $\text{NaH}_2\text{PO}_4$ ), Ethanol, Rhodamine b (RhB), Methyl orange (MO), 2,2,6,6-tetramethyl-4-piperidinol (TEMP), 5,5-dimethyl-1-pyrroline N-oxide (DMPO), methanol (MeOH), tert-butyl alcohol (TBA), and p-benzoquinone benzoquinone (*p*-BQ) were supplied from Macklin Chemical Reagent Co., China. Peroxymonosulfate (PMS,  $\text{KHSO}_5 \cdot 0.5\text{KHSO}_4 \cdot 0.5\text{K}_2\text{SO}_4$ ) was supplied from Sigma Chemical Co., Ltd (St Louis, MO, USA).

## Text S2 Characterization

The external morphology and internal structure of the samples were characterized by scanning electron microscopy (SEM). The phase and crystal structure of the catalyst were analyzed by X-ray diffractometer (XRD, Cu K $\alpha$ ). X-ray photoelectron spectroscopy (XPS) was used to confirm the elemental composition of the sample surface. Linear scanning voltammetric curves (LSV) and open circuit voltage curves (OCPT) were measured on an electrochemical workstation. The active species during the reaction were identified by electron paramagnetic resonance (EPR). The intermediate products of the degradation process were measured and analyzed by ion trap-time of flight mass spectrometry (LC-MS, SHIMADZU). The concentration of metal ions was measured by inductively coupled plasma tandem mass spectrometer (ICP-MS, Agilent 720ES).

**Table S1** Recently reported catalytic performance of comparable electrocatalysts

| Electrode       | Catalysts           | Reaction conditions                                                                           | Degradation efficiency | Reaction rate constant $k_{\text{obs}}$ | Ref.      |
|-----------------|---------------------|-----------------------------------------------------------------------------------------------|------------------------|-----------------------------------------|-----------|
| Graphite plates | [Fe-MOF] = 0.4 g/L  | [Cu-EDTA] = 1 mM;<br>[PS] = 4 mM;<br>[Current density] = 2.86 mA/cm <sup>2</sup>              | 100min 100%            | 0.0415min <sup>-1</sup>                 | [1]       |
| Ti plates       | [ACS-850] = 0.1 g/L | [phenol] = 50 mg/L;<br>[PS] = 15 mM;<br>[Current density] = 2 mA/cm <sup>2</sup>              | 60min 100%             | 0.081min <sup>-1</sup>                  | [2]       |
| BDD             | /                   | [SMZ] = 50 mg/L;<br>[PS] = 0.4 g/L;<br>[pH] = 4;<br>[Current density] = 21 mA/cm <sup>2</sup> | 15min 100%             | /                                       | [3]       |
| LIG             | /                   | [MB] = 5mg/L;<br>[Applied voltage] = 2.5V                                                     | 25h 96%                | /                                       | [4]       |
| LIG             | /                   | [Cr (VI)] = 2mg/L;<br>[Applied voltage] = 3V                                                  | 6h 90%                 | /                                       | [5]       |
| FeCo-LDH/LI-NDG | /                   | [MB] = 20mg/L;<br>[PMS] = 0.5 mM;<br>[Applied voltage] = 2V                                   | 6min 100%              | 0.461min <sup>-1</sup>                  | This work |

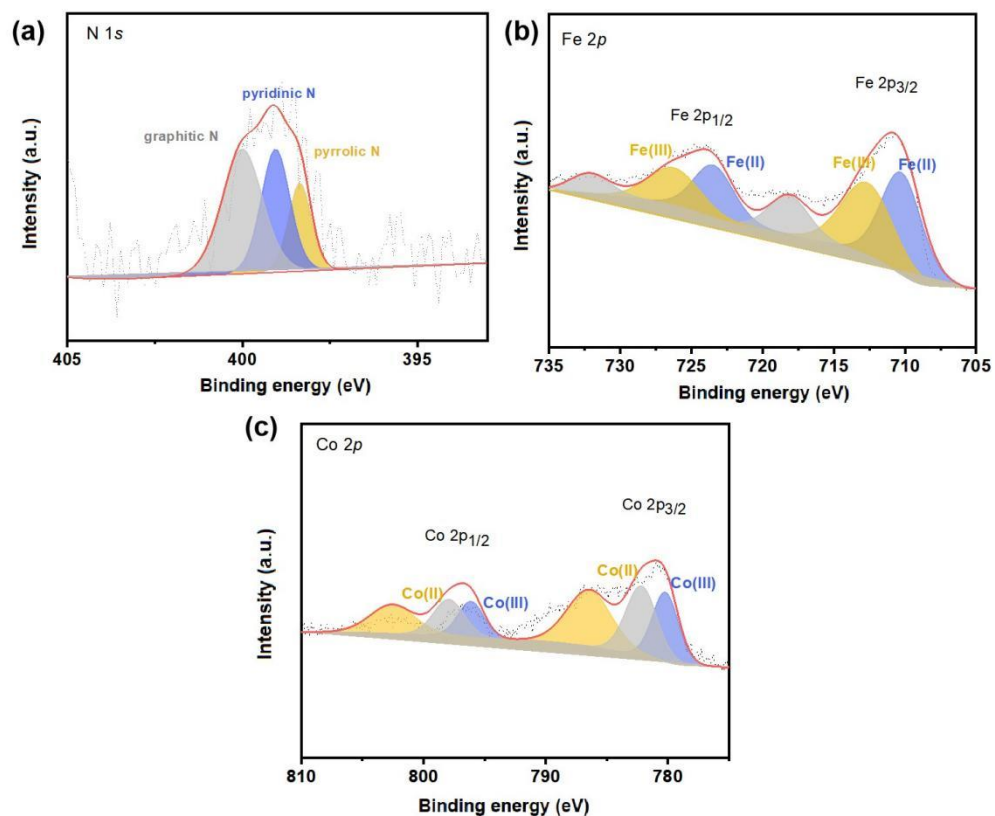

Figure S1. (a) N 1s, (b) Fe 2p, and (c) Co2p XPS spectrum of FeCo-LDH/LI-NDG.

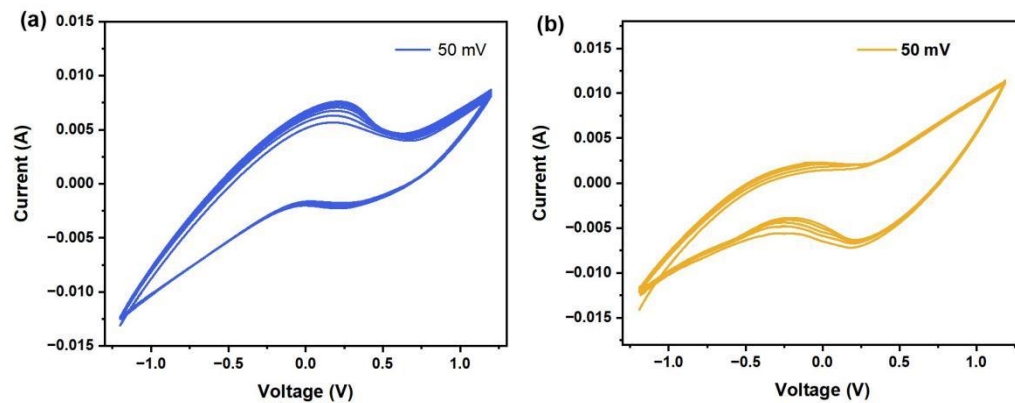

Figure S2. (a) CV curves for 10 consecutive scans of FeCo-LDH/LI-NDG; (a) CV curves for 10 consecutive scans of FeCo-LDH/LI-NDG+PMS.

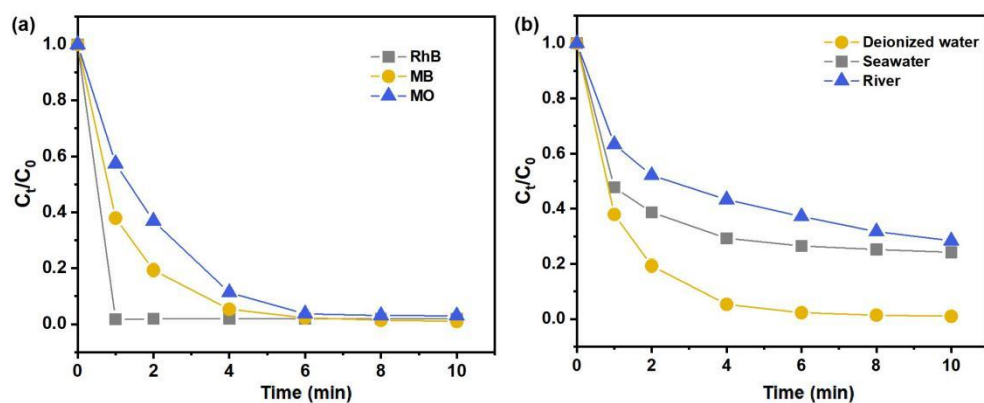

Figure S3. The degradation efficiency of FeCo-LDH/LI-NDG/EC/PMS system with (a) various contaminants and (b) various water bodies. Reaction conditions:  $[MB] = [RhB] = [MO] = 20 \text{ mg/L}$ ;  $[PMS] = 0.5 \text{ mM}$ ;  $[Applied \text{ voltage}] = 2 \text{ V}$ ;  $[Initial \text{ pH}] = 6.8$ .

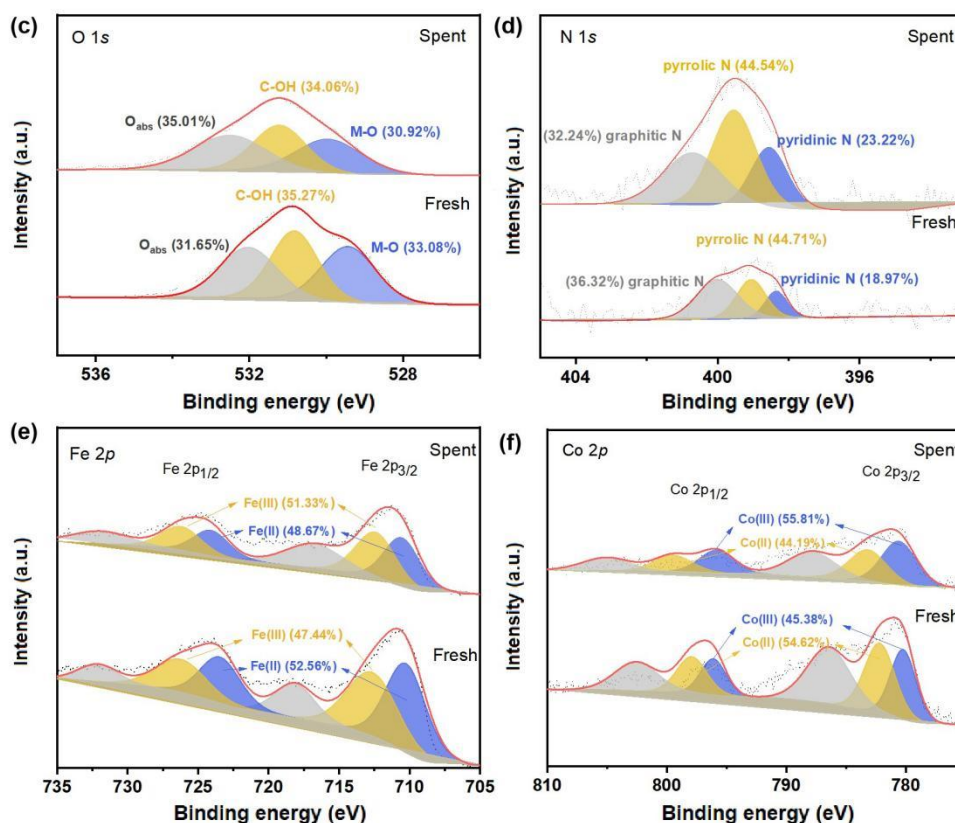

Figure S4. (a) O1s, (b) N1s, (c) Fe 2p, and (d) Co 2p XPS spectrum of spent and fresh FeCo-LDH/LI-NDG.

## References

1. Zhang, Y., Sun, J., Guo, Z., Zheng, X., Guo, P., Xu, J., Lei, Y., The decomplexation of Cu-EDTA by electro-assisted heterogeneous activation of persulfate via acceleration of Fe(II)/Fe(III) redox cycle on Fe-MOF catalyst, *Chem. Eng. J.*, 2021, 430, 133025.<http://doi.org/10.1016/j.cej.2021.133025>.
2. Qi, F., Zeng, Z., Wen, Q., Huang, Z., Enhanced organics degradation by three-dimensional (3D) electrochemical activation of persulfate using sulfur-doped carbon particle electrode: The role of thiophene sulfur functional group and specific capacitance, *J. Hazard. Mater.*, 2021, 416, 125810.<http://doi.org/10.1016/j.jhazmat.2021.125810>.
3. Nashat, M., Mossad, M., El-Etriby, H.K., Gar Alalm, M., Optimization of electrochemical activation of persulfate by BDD electrodes for rapid removal of sulfamethazine, *Chemosphere*, 2022, 286, 131579.<http://doi.org/10.1016/j.chemosphere.2021.131579>.
4. Thamaraiselvan, C., Bandyopadhyay, D., Powell, C.D., Arnusch, C.J., Electrochemical degradation of emerging pollutants via laser-induced graphene electrodes, *Chemical Engineering Journal Advances*, 2021, 8, 100195.<http://doi.org/10.1016/j.cej.2021.100195>.

- 
- 5 . Thamaraiselvan, C., Thakur, A.K., Gupta, A., Arnusch, C.J., Electrochemical Removal of Organic and Inorganic Pollutants Using Robust Laser-Induced Graphene Membranes, *ACS Applied Materials & Interfaces*, 2021, 13, 1452-1462.<http://doi.org/10.1021/acsami.0c18358>.
